# Supplementary material
Source: MDPI journal article supplement (https://www.mdpi.com/2571-9637/2/2/23)
Supplement: s1 [file s1]

Supporting Information

## Electro-oxidation of CO Saturated in 0.1 M HClO<sub>4</sub> on Basal and Stepped Pt Single-Crystal Electrodes at Room Temperature Accompanied by Surface Reconstruction

Kiyotaka Abe <sup>1,‡</sup>, Hiroyuki Uchida <sup>1,\*</sup> and Junji Inukai <sup>1,\*</sup>

<sup>1</sup> Clean Energy Research Center, University of Yamanashi; jinukai@yamanashi.ac.jp

<sup>‡</sup> Present Affiliation: PANASONIC CORPORATION; abe.kiyotaka@jp.panasonic.com

\* Correspondence: [h-uchida@yamanashi.ac.jp](mailto:h-uchida@yamanashi.ac.jp) (H.U.); [jinukai@yamanashi.ac.jp](mailto:jinukai@yamanashi.ac.jp) (J.I.); Tel.: (+81-55-220-8185 (J.I.))

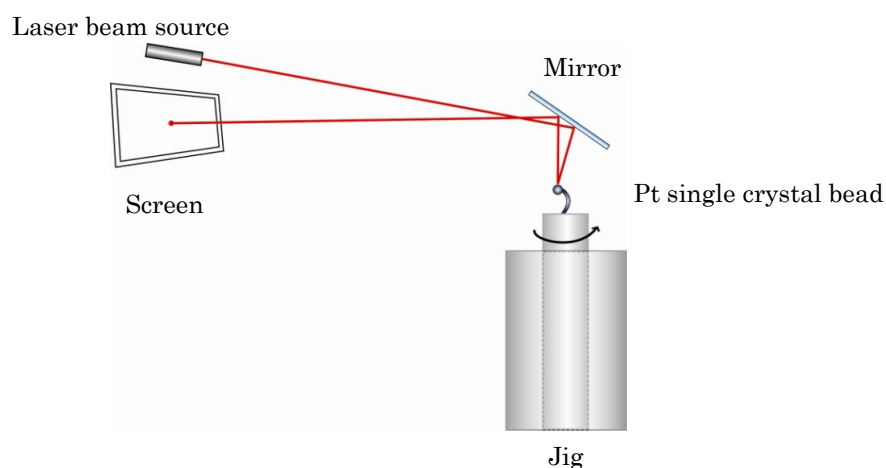

Figure S1 Schematic illustration of the adjustment of (111) and (100) facets by a laser beam reflection method

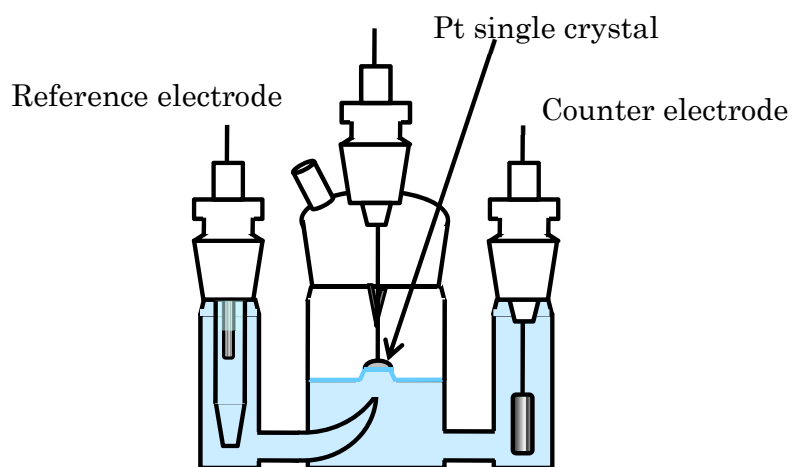

Figure S2 Schematic illustration of a three-compartment cell. The electrochemical measurements were carried out with the hanging meniscus method.
